# Supplementary material
Source: PubMed Central journal article supplement (PMC3567489)
Supplement: emboj2012356s1.pdf [file emboj2012356s1.pdf]

**Supplementary Material: Malvezzi et al., 2012 “A structural basis for kinetochore recruitment of the Ndc80 complex via two distinct centromere receptors”**

Figures S1-S6 with Figure legends

Supplementary Table 1 (Yeast strains used in this study)

Supplementary Table 2 (Accession numbers)

Supplementary Experimental procedures

A

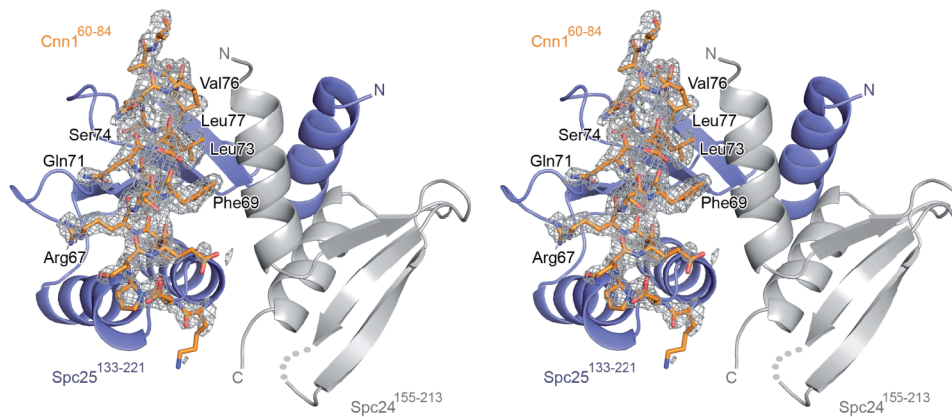

B

Spc24/Spc25<sup>Cnn1</sup>  
Spc24/Spc25

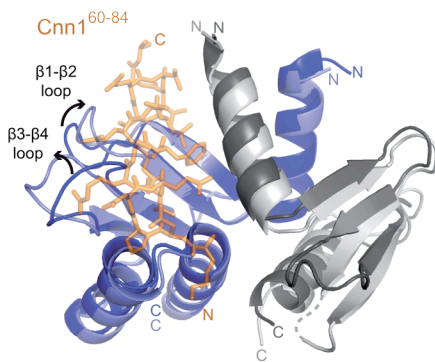

Figure S1 Malvezzi et al., 2012

**Figure S1: Electron density of the Cnn1 peptide bound to Spc24-25 and Spc24-25 changes upon Cnn1-binding.**

**A:** Stereo view of the  $2F_o - F_c$  difference Fourier map (contoured at  $1.0 \sigma$  and displayed as grey cage) of the  $\text{Spc24}^{155-213}\text{-25}^{133-221}\text{-Cnn1}^{60-84}$  crystal structure located at the Spc24-25 interface and calculated without the Cnn1 peptide. Spc24 and Spc25 are represented according to their secondary structure, in light grey and slate blue, respectively. Cnn1 is shown as sticks with C in orange, N in blue and O in red. The labels refer to the residues of Cnn1 involved in Spc24-25

binding and observable in the figure. Ser74 is also labeled. A dotted line indicates the residue Lys184 of Spc24 not visible in the electron density (see experimental procedures). **B**: Superposition of Spc24<sup>155-213</sup>-25<sup>133-221</sup>-Cnn1<sup>60-84</sup> (Spc24-25<sup>Cnn1</sup>) and Spc24<sup>155-213</sup>-25<sup>133-221</sup> (Spc24-25; Wei et al., 2006), performed on Spc25<sup>133-221</sup>. The secondary structure of Spc24 and Spc25 in Spc24-25<sup>Cnn1</sup> is shown in light grey and slate blue, respectively; in the Spc24-25 crystal structure, in dark grey and blue, respectively. Cnn1 is displayed in orange sticks (transparency 60%). The arrows indicate the movement of the  $\beta$ 1- $\beta$ 2 and  $\beta$ 3- $\beta$ 4 loops upon Cnn1-binding.

Spc24

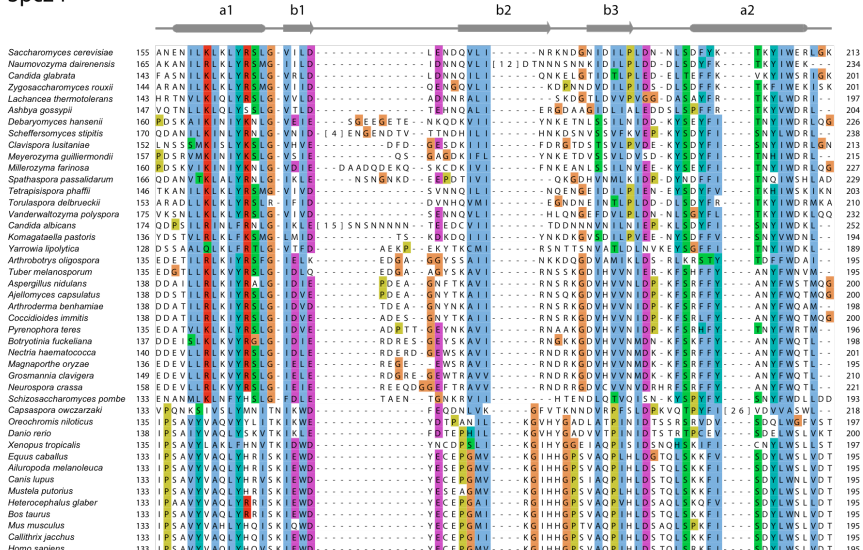

Spc25

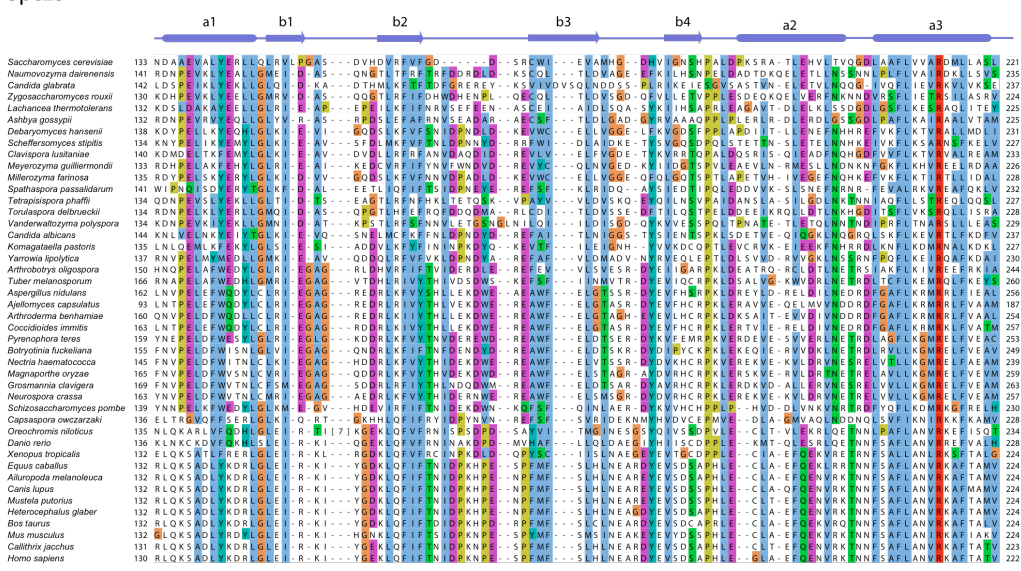

Figure S2 Malvezzi et al., 2012

Figure S2: Sequence alignment of Spc24 and Spc25 homologues. Background coloring of the residues is based on the clustalx coloring scheme.

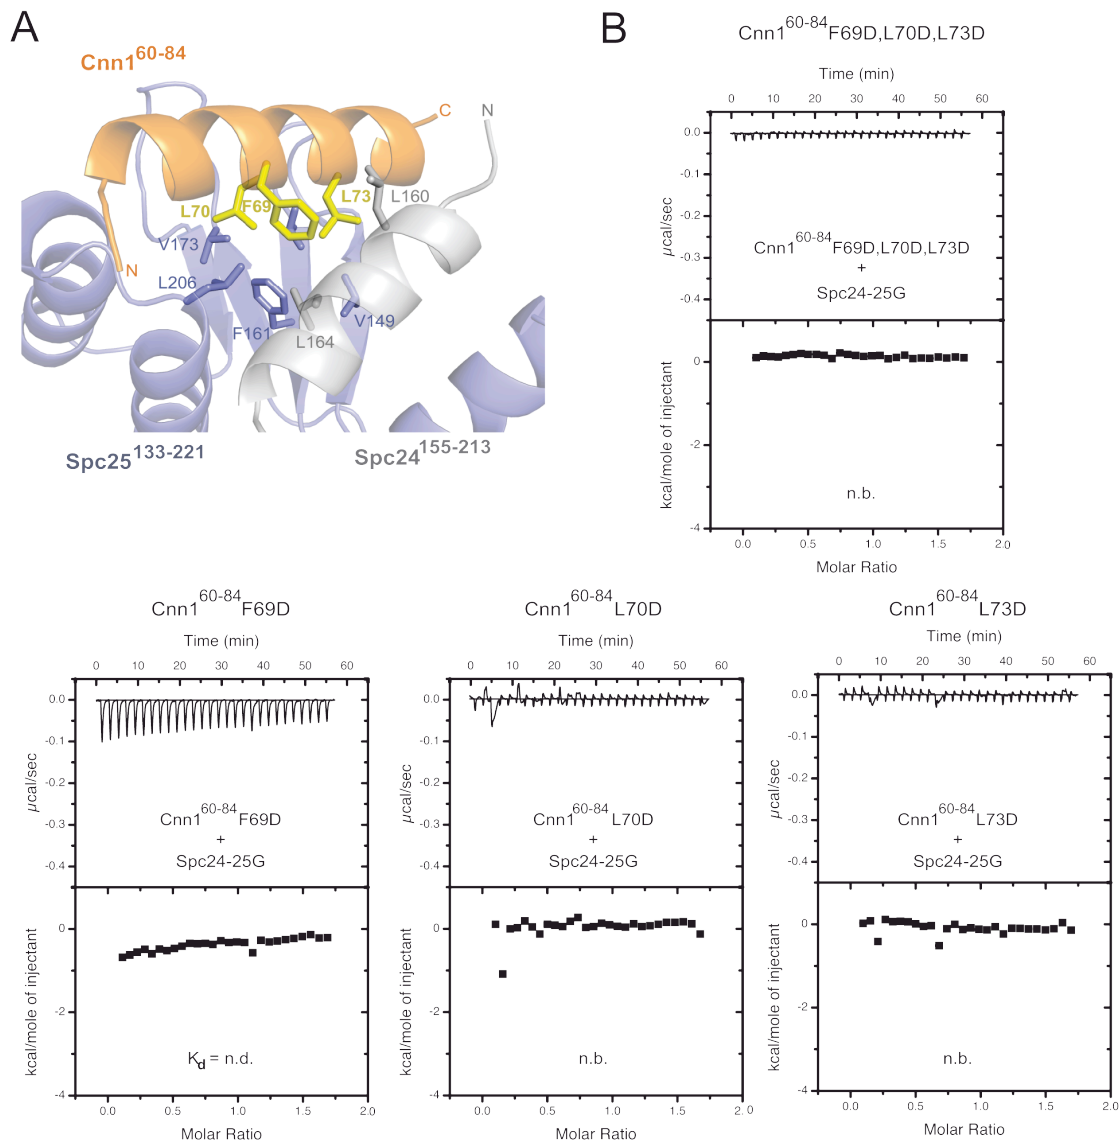

Figure S3 Malvezzi et al., 2012

**Figure S3: Validation of the Spc24-25/Cnn1 interface by mutation of Cnn1**

**A:** Role of the Cnn1<sup>60-84</sup> amino acids F69, L70 and L73 in Spc24<sup>155-213</sup>-Spc25<sup>133-221</sup> binding. The secondary structure of Spc24, Spc25 and Cnn1 is displayed in light grey, slate blue and orange, respectively (transparency 40%). The Cnn1 residues

F69, L70 and L73, mutated individually or in combination to aspartic acid for validating the Spc24<sup>155-213</sup>-25<sup>133-221</sup>/Cnn1<sup>60-84</sup> interface, are highlighted as yellow sticks. Spc24 and Spc25 residues that establish van der Waals contacts with F69, L70 or L73 are displayed as sticks. **B**: Isothermal titration calorimetry performed by titrating wild-type Spc24-25 globular domain (Spc24-25G) Cnn1<sup>60-84</sup> triple mutant (F69D, L70D, L73D) or each single mutant. n.b. = no binding. n.d. = not definable.

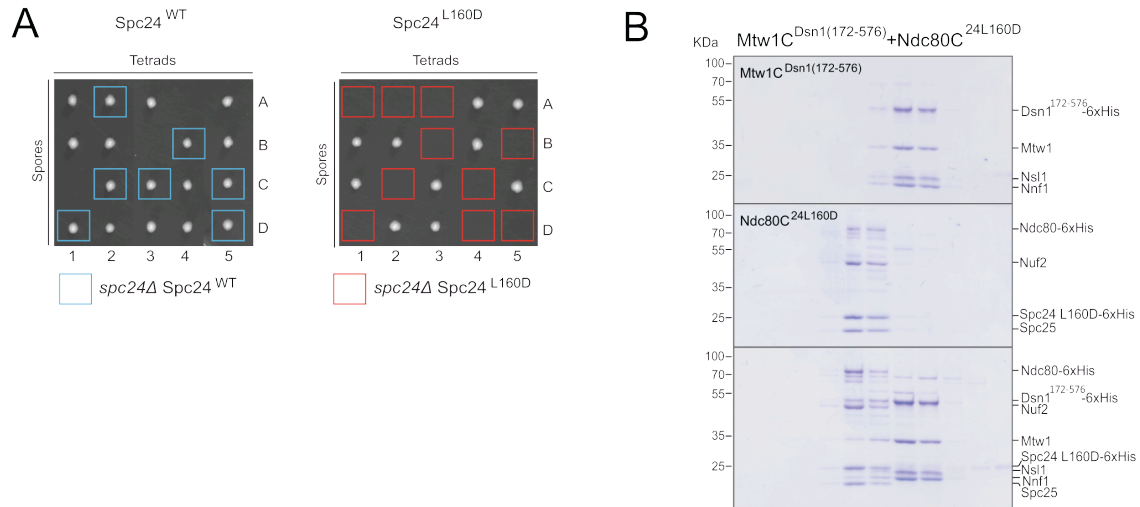

Figure S4 Malvezzi et al., 2012

**Figure S4: The L160D mutation of Spc24 is lethal and disrupts interaction between Ndc80 and Mtw1 complexes *in vitro*.**

**A:** Asci dissection of  $\Delta spc24$ /Spc24 Spc24<sup>WT</sup> (left) and  $\Delta spc24$ /Spc24 Spc24<sup>L160D</sup> (right). The viable  $\Delta spc24$  Spc24<sup>WT</sup> spores are highlighted with a light blue square. The  $\Delta spc24$  Spc24<sup>L160D</sup> spores, marked with a red rectangle, failed to be recovered, indicating that L160D is a lethal Spc24 mutation. **B:** Elution profiles and Coomassie-stained gels of analytical size-exclusion chromatography performed with 4  $\mu$ M Mtw1<sup>Dsn1(172-576)</sup> complex (Mtw1C<sup>Dsn1(172-576)</sup>), 4  $\mu$ M Ndc80 complex including the Spc24<sup>L160D</sup> mutant (Ndc80C<sup>24L160D</sup>) and their combination. The lack of a shift to earlier elution volumes of both molecules indicates abolished complex formation.

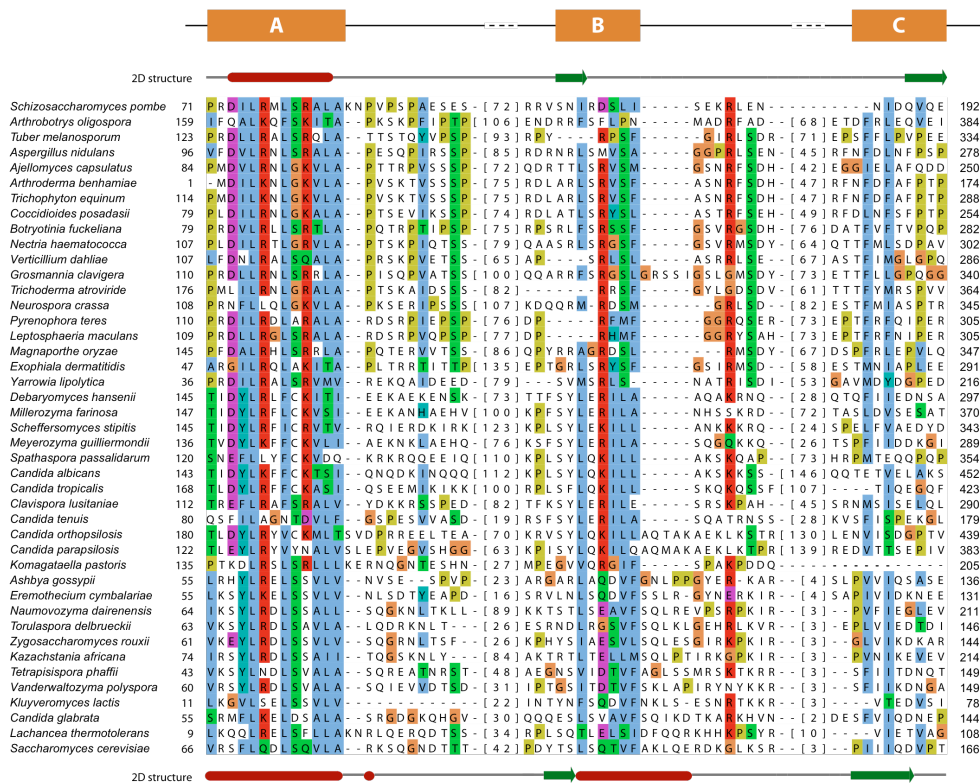

Figure S5 Malvezzi et al., 2012

### Figure S5: Multiple sequence alignment of an N-terminal region in Cnn1 homologues

*S. cerevisiae* (above) and *S. pombe* (below) secondary structure predictions are derived from the Jpred 3 server (alpha helices in red, beta strands in green). Background coloring of the residues is based on the clustalx colouring scheme. The number of omitted residues is indicated in brackets.



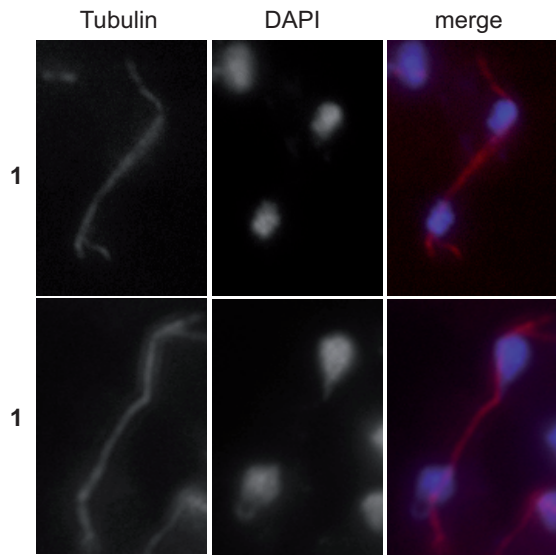

WT

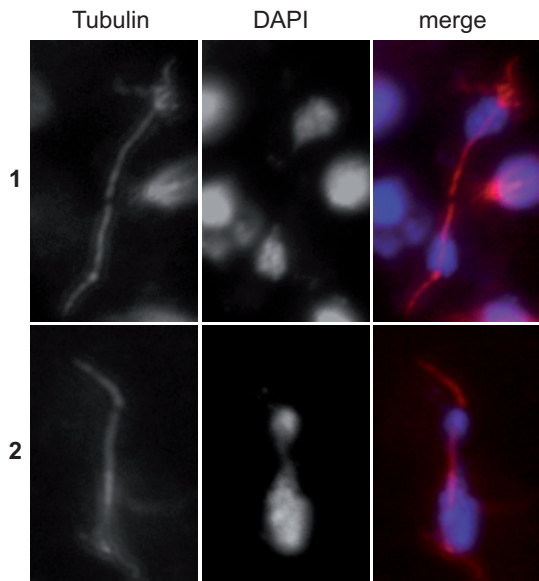

Nuf2-13myc Nnf1-3HA

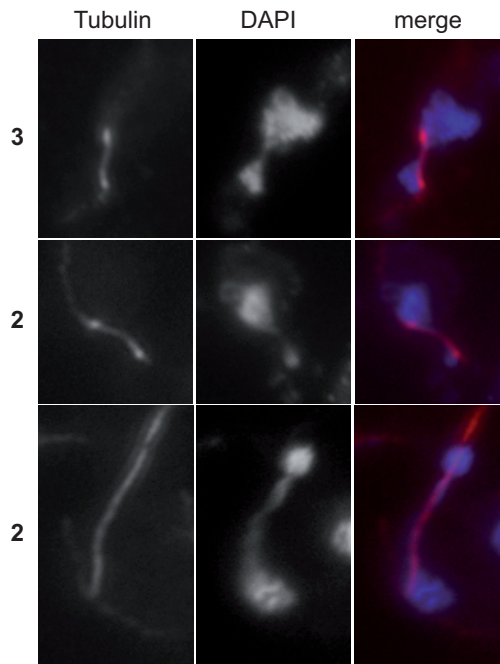

Nuf2-13myc Nnf1-3HA  $\Delta$ *cnn1* Cnn1 16A

- 1: equal, wild-type segregation
- 2: unequal segregation
- 3: "cut" phenotype: unequal segregation with short spindle and cut DNA

**Figure S6: The phospho-inhibiting Cnn1 16A mutant shows a variety of chromosome segregation defects.**

Immunofluorescence microscopy performed on large budded cells of the indicated strains grown at the restrictive temperature (37°C). DNA is stained with DAPI and microtubules visualized using anti-tubulin antibody. The different phenotypic categories are indicated with a number and described below the panel.

**Supplementary Table 1**

**Yeast strains**

| <b>Strain</b> | <b>Genotype</b>                                                                                      | <b>Source</b> |
|---------------|------------------------------------------------------------------------------------------------------|---------------|
| SWY572        | Mat a ade2-1, his3Δ200, ura3-52, leu2-3,11::Cnn1(T3A, T21A, T42A, S177A, S192) ΔHF-TetR::LEU2        | This study    |
| SWY573        | Mat a ade2-1, his3Δ200, ura3-52, leu2-3,11::Cnn1(delta 105-270) ΔHF-TetR::LEU2                       | This study    |
| SWY574        | Mat a ade2-1, his3Δ200, ura3-52, leu2-3,11::Cnn1(delta 193-270) ΔHF-TetR::LEU2                       | This study    |
| SWY579        | Mat a ade2-1, his3Δ200, ura3-52, leu2-3,11::Cnn1(T3D, T21D, T42D, S74D, S177D, S192D) ΔHF-TetR::LEU2 | This study    |
| SWY601        | Mat alpha, ura3-52, lys2-801, ade2-1, Cnn1-6xFlag::KanMX, Nuf2-13xmyc::TRP1, cdc15-2::LEU            | This study    |
| SWY605        | Mat a ade2-1, his3Δ200, ura3-52, leu2-3,11::Cnn1ΔHF-TetR (S74D)::LEU2                                | This study    |
| SWY606        | Mat a ade2-1, his3Δ200, ura3-52, leu2-3,11::Cnn1ΔHF-TetR (delta175-270)::LEU2                        | This study    |
| SWY607        | Mat a ade2-1, his3Δ200, ura3-52, leu2-3,11::Cnn1ΔHF-TetR (delta 130-166)::LEU2                       | This study    |

|        |                                                                                                        |                         |
|--------|--------------------------------------------------------------------------------------------------------|-------------------------|
| SWY624 | Mat a ade2-1, his3Δ200, ura3-52, leu2-3,11::Cnn1ΔHF-TetR (delta 91-125)::LEU2                          | This study              |
| SWY627 | Mat a, cdc15-2, leu2::PDS1-myc18::LEU2, ura3::pGAL-MPS1-myc::URA3, Cnn1-6xFlag::KanMX                  | This study              |
| SWY631 | Mat a, GAL-1xmyc-MPS1::URA3, Cnn1-6xFlag::KanMX                                                        | This study              |
| SWY637 | MATa, leu2-3,112::Cnn1-5A-6xFlag::LEU2, ura3-52, ade2-1, cnn1Δ::HIS3                                   | This study              |
| SWY638 | MATa, leu2-3,112::Cnn1-11A-6xFlag::LEU2, ura3-52, ade2-1, cnn1Δ::HIS3                                  | This study              |
| SWY630 | Mat a, lys2-801, ura3-52, cnn1Δ::HIS3, leu2-3,112::Cnn1-WT-6xFlag::LEU2                                | This study              |
| SWY544 | Mat a ade2-1, his3Δ200, ura3-52, leu2-3,11::Cnn1ΔHF-TetR::LEU2                                         | Schleiffer et al., 2012 |
| SWY545 | Mat a ade2-1, his3Δ200, ura3-52, leu2-3,11::Cnn1ΔHFA65-79-TetR::LEU2                                   | Schleiffer et al., 2012 |
| SWY643 | Mat a, lys2-801, ura3-52, leu2-3,112::Cnn1-16A-6xFlag::LEU2, Nuf2-13xmyc::TRP, Nnf1-3xHA::KanMX        | This study              |
| SWY648 | Mat a, ura3-52, ade2-1, Nuf2-13xmyc::TRP1, Nnf1-3xHA::KanMX, cnn1Δ::HIS3                               | This study              |
| SWY650 | Mat a, lys2-801, ura3-52, leu2-3,112::Cnn1-WT-6xFlag::LEU2, Nuf2-13xmyc::TRP, Nnf1-3xHA::KanMX         | This study              |
| SWY344 | Mat alpha, leu2-3,112, his3Δ200, dsn1Δ::HIS3, ura3-52, (pRS316-Dsn1-WT-URA3)                           | Hornung et al., 2011    |
| VFY85  | Mat a/alpha, Ade2/ade2-1, his3Δ200/his3Δ200, ura3-52/ura3-52, Lys2/lys2-801, leu2-3,112/Spc24Δ::LEU2   | This study              |
| FMY13  | Mat a/alpha, Ade2/ade2-1, leu2-3,112/leu2-3,112, ura3-52/ura3-52, Lys2/lys2-801, his3Δ200/Spc25Δ::HIS3 | This study              |

## Supplementary Table 2: Organisms and accession numbers:

|                                  |                |
|----------------------------------|----------------|
| Sp24                             |                |
| <i>Saccharomyces cerevisiae</i>  | NP_013835.1    |
| <i>Naumovozyma dairenensis</i>   | XP_003671689.1 |
| <i>Candida glabrata</i>          | XP_448382.1    |
| <i>Zygosaccharomyces rouxii</i>  | XP_002498858.1 |
| <i>Lachancea thermotolerans</i>  | XP_002552913.1 |
| <i>Ashbya gossypii</i>           | NP_985750.1    |
| <i>Debaryomyces hansenii</i>     | XP_457153.1    |
| <i>Scheffersomyces stipitis</i>  | XP_001383793.1 |
| <i>Clavispora lusitaniae</i>     | XP_002617657.1 |
| <i>Meyerozyma guilliermondii</i> | XP_001485425.1 |
| <i>Millerozyma farinosa</i>      | CCE72763.1     |
| <i>Spathaspora passalidarum</i>  | EGW33243.1     |
| <i>Tetrapisispora phaffii</i>    | XP_003686554.1 |
| <i>Torulaspora delbrueckii</i>   | XP_003678746.1 |
| <i>Vanderwaltozyma polyspora</i> | XP_001647470.1 |
| <i>Candida albicans</i>          | XP_722533.1    |
| <i>Komagataella pastoris</i>     | XP_002490616.1 |
| <i>Yarrowia lipolytica</i>       | XP_503439.1    |
| <i>Arthrotrichum oligosporum</i> | EGX46547.1     |
| <i>Tuber melanosporum</i>        | XP_002836028.1 |
| <i>Aspergillus nidulans</i>      | XP_663828.1    |
| <i>Ajellomyces capsulatus</i>    | XP_001538360.1 |
| <i>Arthroderma benhamiae</i>     | XP_003016504.1 |
| <i>Coccidioides immitis</i>      | XP_001245621.1 |
| <i>Pyrenophora teres</i>         | XP_003295680.1 |
| <i>Botryotinia fuckeliana</i>    | XP_001548924.1 |
| <i>Nectria haematococca</i>      | XP_003040061.1 |
| <i>Magnaporthe oryzae</i>        | XP_369388.1    |
| <i>Grosmannia clavigera</i>      | EFX03083.1     |
| <i>Neurospora crassa</i>         | Q7S8M2.1       |
| <i>Schizosaccharomyces pombe</i> | NP_596128.1    |
| <i>Capsaspora owczarzaki</i>     | EFW45374.1     |
| <i>Oreochromis niloticus</i>     | XP_003443129.1 |
| <i>Danio rerio</i>               | NP_001019611.1 |
| <i>Xenopus tropicalis</i>        | NP_989057.1    |
| <i>Equus caballus</i>            | XP_001490260.1 |
| <i>Ailuropoda melanoleuca</i>    | XP_002921402.1 |
| <i>Canis lupus</i>               | XP_853911.1    |
| <i>Mustela putorius</i>          | AES07274.1     |
| <i>Heterocephalus glaber</i>     | EHB12947.1     |
| <i>Bos taurus</i>                | NP_001068859.1 |

|                           |                |
|---------------------------|----------------|
| Mus musculus              | NP_080558.1    |
| Callithrix jacchus        | XP_002761796.1 |
| Homo sapiens              | NP_872319.1    |
|                           |                |
| Spc25                     |                |
| Saccharomyces cerevisiae  | NP_010934.1    |
| Naumovozyma dairenensis   | XP_003667454.1 |
| Candida glabrata          | XP_449857.1    |
| Zygosaccharomyces rouxii  | XP_002497939.1 |
| Lachancea thermotolerans  | XP_002554302.1 |
| Ashbya gossypii           | NP_986227.1    |
| Debaryomyces hansenii     | XP_460184.2    |
| Scheffersomyces stipitis  | XP_001385929.2 |
| Clavispora lusitaniae     | XP_002614624.1 |
| Meyerozyma guilliermondii | XP_001483109.1 |
| Millerozyma farinosa      | CCE79629.1     |
| Spathaspora passalidarum  | EGW34088.1     |
| Tetrapisispora phaffii    | XP_003684562.1 |
| Torulaspora delbrueckii   | XP_003680731.1 |
| Vanderwaltozyma polyspora | XP_001646965.1 |
| Candida albicans          | XP_712168.1    |
| Komagataella pastoris     | XP_002494316.1 |
| Yarrowia lipolytica       | XP_500108.1    |
| Arthrotrys oligospora     | EGX44726.1     |
| Tuber melanosporum        | XP_002835120.1 |
| Aspergillus nidulans      | XP_658996.1    |
| Ajellomyces capsulatus    | XP_001544957.1 |
| Arthroderma benhamiae     | XP_003011093.1 |
| Coccidioides immitis      | XP_001243298.1 |
| Pyrenophora teres         | XP_003295304.1 |
| Botryotinia fuckeliana    | XP_001553139.1 |
| Nectria haematococca      | XP_003049634.1 |
| Magnaporthe oryzae        | XP_362871.1    |
| Grosmannia clavigera      | EFW99016.1     |
| Neurospora crassa         | XP_001728160.1 |
| Schizosaccharomyces pombe | NP_588208.1    |
| Capsaspora owczarzaki     | EFW43520.1     |
| Oreochromis niloticus     | XP_003447378.1 |
| Danio rerio               | NP_001116529.1 |
| Xenopus tropicalis        | NP_001005041.1 |
| Equus caballus            | XP_001497531.1 |
| Ailuropoda melanoleuca    | XP_002916555.1 |
| Canis lupus               | XP_545510.3    |
| Mustela putorius          | AES07275.1     |
| Heterocephalus glaber     | EHB17922.1     |

|                                  |                |
|----------------------------------|----------------|
| <i>Bos taurus</i>                | NP_001029402.1 |
| <i>Mus musculus</i>              | NP_001186052.1 |
| <i>Callithrix jacchus</i>        | XP_002749343.1 |
| <i>Homo sapiens</i>              | NP_065726.1    |
|                                  |                |
| Cnn1                             |                |
| <i>Schizosaccharomyces pombe</i> | NP_595115.1    |
| <i>Arthrotrrys oligospora</i>    | EGX48959.1     |
| <i>Tuber melanosporum</i>        | XP_002836693.1 |
| <i>Aspergillus nidulans</i>      | XP_662356.1    |
| <i>Ajellomyces capsulatus</i>    | XP_001544140.1 |
| <i>Arthroderma benhamiae</i>     | XP_003014739.1 |
| <i>Trichophyton equinum</i>      | EGE09556.1     |
| <i>Coccidioides posadasii</i>    | XP_003066562.1 |
| <i>Botryotinia fuckeliana</i>    | XP_001545878.1 |
| <i>Nectria haematococca</i>      | XP_003053257.1 |
| <i>Verticillium dahliae</i>      | EGY20957.1     |
| <i>Grosmannia clavigera</i>      | EFW98428.1     |
| <i>Trichoderma atroviride</i>    | EHK42916.1     |
| <i>Neurospora crassa</i>         | XP_964520.1    |
| <i>Pyrenophora teres</i>         | XP_003299018.1 |
| <i>Leptosphaeria maculans</i>    | CBX94982.1     |
| <i>Magnaporthe oryzae</i>        | XP_366656.1    |
| <i>Exophiala dermatitidis</i>    | EHY54348.1     |
| <i>Yarrowia lipolytica</i>       | XP_500233.1    |
| <i>Debaryomyces hansenii</i>     | XP_461484.2    |
| <i>Millerozyma farinosa</i>      | CCE85478.1     |
| <i>Scheffersomyces stipitis</i>  | XP_001385381.2 |
| <i>Meyerozyma guilliermondii</i> | XP_001485403.1 |
| <i>Spathaspora passalidarum</i>  | EGW35176.1     |
| <i>Candida albicans</i>          | XP_717589.1    |
| <i>Candida tropicalis</i>        | XP_002549682.1 |
| <i>Clavispora lusitaniae</i>     | XP_002614395.1 |
| <i>Candida tenuis</i>            | EGV60430.1     |
| <i>Candida orthopsilosis</i>     | CCG21148.1     |
| <i>Candida parapsilosis</i>      | CCE43188.1     |
| <i>Komagataella pastoris</i>     | XP_002493147.1 |
| <i>Ashbya gossypii</i>           | NP_985803.2    |
| <i>Eremothecium cymbalariae</i>  | XP_003645120.1 |
| <i>Naumovozyma dairenensis</i>   | XP_003668899.1 |
| <i>Torulaspora delbrueckii</i>   | XP_003681422.1 |
| <i>Zygosaccharomyces rouxii</i>  | XP_002499334.1 |
| <i>Kazachstania africana</i>     | CCF60088.1     |
| <i>Tetrapisispora phaffii</i>    | XP_003688342.1 |
| <i>Vanderwaltozyma polyspora</i> | XP_001643240.1 |

|                                |                |
|--------------------------------|----------------|
| Kluyveromyces lactis           | XP_451039.1    |
| Candida glabrata               | XP_445262.1    |
| Lachancea thermotolerans       | XP_002555079.1 |
| Saccharomyces cerevisiae       | NP_116704.1    |
|                                |                |
| Dsn1                           |                |
| Saccharomyces cerevisiae       | EGA58243.1     |
| Schizosaccharomyces pombe      | NP_595459.1    |
| Ustilago maydis                | XP_760485.1    |
| Batrachochytrium dendrobatidis | EGF78698.1     |
| Kluyveromyces lactis           | XP_453754.1    |
| Ajellomyces dermatitidis       | XP_002623137.1 |
| Coprinopsis cinerea            | XP_001838507.2 |
| Coccidioides immitis           | XP_001246294.1 |
| Gibberella zeae                | XP_390317.1    |
| Aspergillus fumigatus          | XP_001481632.1 |
| Danio rerio                    | XP_001923648.1 |
| Xenopus tropicalis             | XP_002940613.1 |
| Pyrenophora teres              | XP_003299634.1 |
| Neurospora crassa              | XP_961430.1    |
| Gallus gallus                  | NP_001038125.1 |
| Homo sapiens                   | NP_001138787.1 |
| Capsaspora owczarzaki          | EFW43264.1     |
| Candida glabrata               | XP_449189.1    |
| Monosiga brevicollis           | XP_001744789.1 |
| Phytophthora infestans         | XP_002900073.1 |
| Salpingoeca sp.                | EGD83324.1     |

## Supplementary Experimental procedures

### *Details of protein expression and purification*

All versions of His-tagged Spc24-25 full length and globular domain were cloned in cassette 1 and 2 of the pETduett-1 vector (Novagen) and co-expressed in *E. coli* strain BI21-CodonPlus(DE3)-RIL (Agilent Technologies) ON at 18°C after induction at OD<sub>600</sub> 0.6-0.7 with 0.5 mM isopropyl-β-D-thiogalactopyranoside (IPTG). N-terminal 6XHis-tagged Cnn1ΔHFD and Cnn1ΔHFD<sup>ΔBC</sup> were cloned in cassette 1 of the pETduett-1 vector and expressed in *E. coli* strain Rosetta2(DE3)pLysS for 3h at 37°C after induction with 0.5 mM IPTG. Mtw1<sup>Dsn1(172-576)</sup> complex, Mtw1<sup>Dsn1(172-547)</sup> complex, Ndc80 complex-subunits Nuf2 and Ndc80 were cloned and expressed as described in Schleiffer et al., 2012, Lampert et al., 2010. For the purification of all versions of Spc24-25 full length and globular domain, binding and washing to Ni-NTA agarose beads (Qiagen) was performed in 30 mM HEPES (pH 7.0), 300 mM NaCl, 30 mM imidazole and 1mM dithiothreitol (DTT). After elution with 250 mM imidazole, the complexes were subjected to Ndc80 complex-reconstitution with Ndc80-Nuf2 (see below) or loaded on Superdex 200 HiLoad 16/60 (GE Healthcare) column equilibrated in 10 mM Bis-Tris propane (pH7.6), 250 mM NaCl and 10 mM DTT for crystallization experiments or 20 mM Hepes (pH 7.5) and 120 mM NaCl for all other purposes. 6xHis-Ndc80-Nuf2 complex was bound to and washed on Ni-NTA agarose beads with 30 mM HEPES (pH7.5), 500 mM NaCl and 30 mM imidazole, eluted with 30 mM HEPES (pH7.5), 150 mM NaCl and 250 mM imidazole, subjected to Ndc80 complex-reconstitution *in vitro* with full length



Spc24-25 and loaded on Superdex 200 HiLoad 16/60 column equilibrated in 20 mM Hepes (pH 7.5) and 120 mM NaCl. Ni-NTA purification of 6xHis-Cnn1 $\Delta$ HFD or 6xHis-Cnn1 $\Delta$ HFD<sup>ABC</sup> was performed in 25 mM HEPES (pH7.5), 150 mM NaCl, 30 mM imidazole and 5% glycerol, the protein eluted with 250 mM imidazole and subsequently loaded on Superdex 200 HiLoad 16/60 column equilibrated in 20 mM Hepes (pH 7.5), 120 mM NaCl and 5% glycerol. The purification of Mtw1<sup>Dsn1(172-576)</sup> and Mtw1<sup>Dsn1(172-547)</sup> complexes was performed as described in Hornung et al., 2011, with the following modification: the anion-exchange chromatography was performed applying a first linear gradient of 10 bed volumes from 80 mM NaCl to 240 mM NaCl and a second elution step at 500 mM NaCl in 30 mM Tris-HCl (pH 8.5) and 5% glycerol.
